# Supplementary material for: Iron removal enhances vitamin C-induced apoptosis and growth inhibition of K-562 leukemic cells
Source: PubMed Central journal article supplement (PMC6255900; doi:10.1038/s41598-018-35730-8), 2018-11-26

**Supplementary Information for:**

**Iron removal enhances vitamin C-induced apoptosis and growth inhibition of K-562 leukemic cells**

Mitsuyo Tsuma-Kaneko<sup>1,2</sup>, Masakazu Sawanobori<sup>2</sup>, Shohei Kawakami<sup>1,2</sup>, Tomoko Uno<sup>1</sup>, Yoshihiko Nakamura<sup>1</sup>, Makoto Onizuka<sup>1,2</sup>, Kiyoshi Ando<sup>1,2</sup>, Hiroshi Kawada<sup>1,2</sup>

<sup>1</sup>Research Center for Cancer Stem Cell, <sup>2</sup>Division of Hematology/Oncology, Department of Medicine, Tokai University School of Medicine, 143 Shimokasuya, Isehara, Kanagawa 259-1143, Japan.

Corresponding author: Hiroshi Kawada, M.D., Ph.D.

Division of Hematology/Oncology, Department of Medicine, Tokai University School of Medicine, 143 Shimokasuya, Isehara, Kanagawa 259-1143, Japan.

Phone: +81-463-93-1121 ext. 5059, e-mail: [kawada@tokai.ac.jp](mailto:kawada@tokai.ac.jp)

**Supplementary Figure 1. Western blot analysis of cleaved caspase-3 and phosphorylated p38.**

\*P<0.0001. The values represent the mean  $\pm$  SD values of quadruplicate samples.

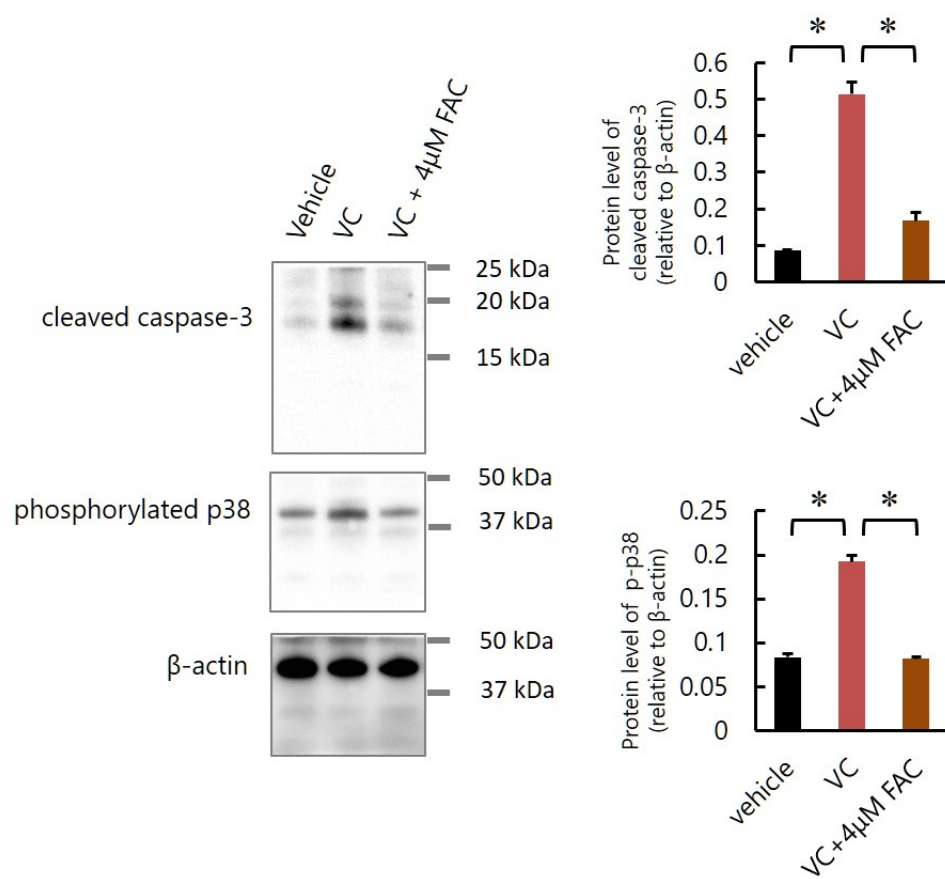

**Supplementary Figure 2. Full-length pictures of the blots presented in the main figure 2A.**

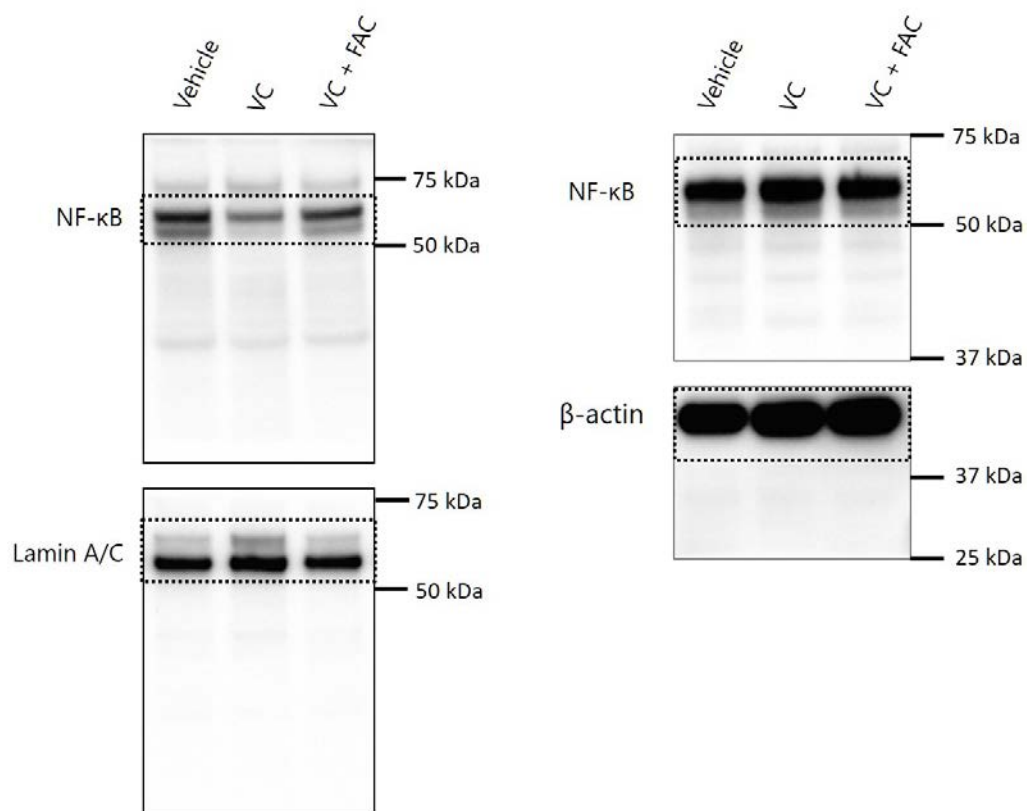

**Supplementary Figure 3. Full-length pictures of the blots presented in the main figure 2C.**

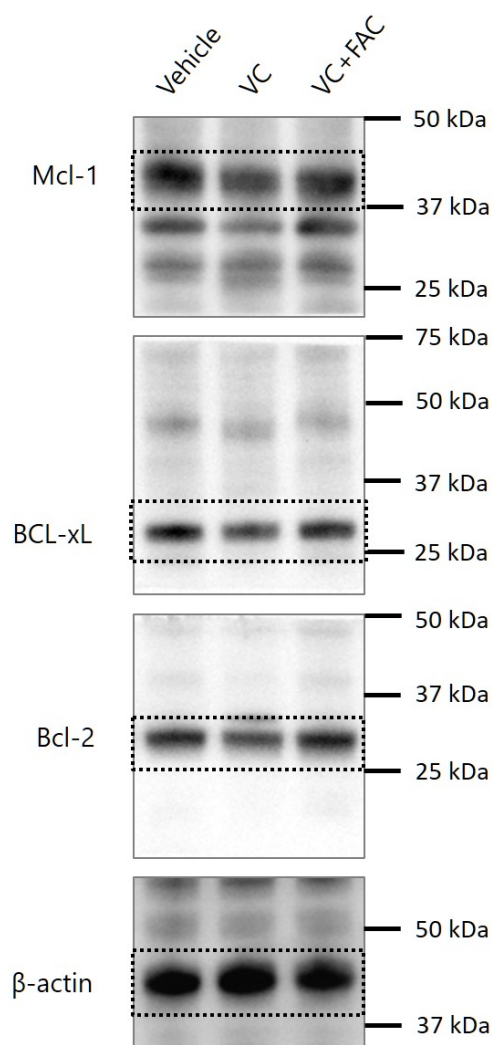

**Supplementary Figure 4. Full-length pictures of the blots presented in the main figure 2D.**

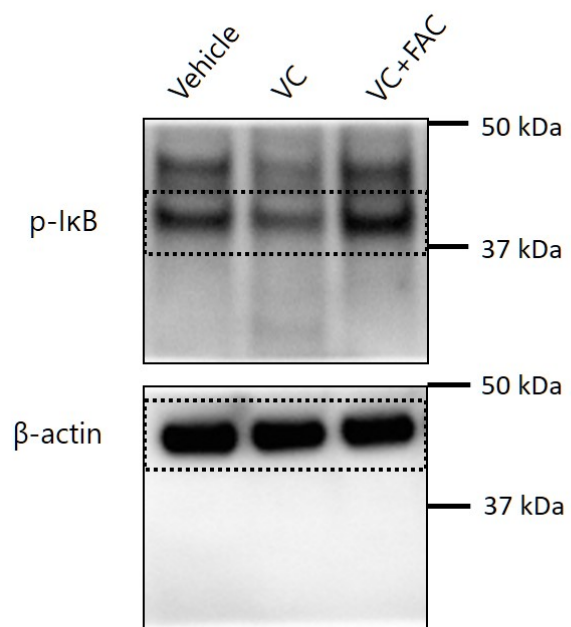

**Supplementary Figure 5. Full-length pictures of the blots presented in the main figure 5A.**

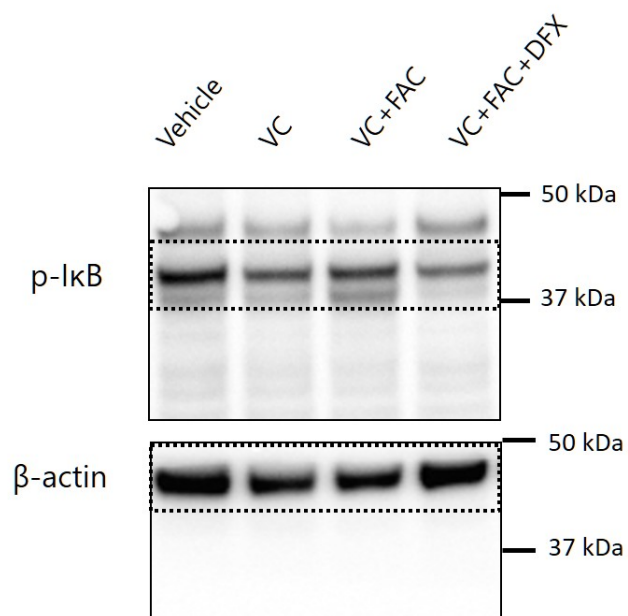

**Supplementary Figure 6. Full-length pictures of the blots presented in the main figure 5B.**

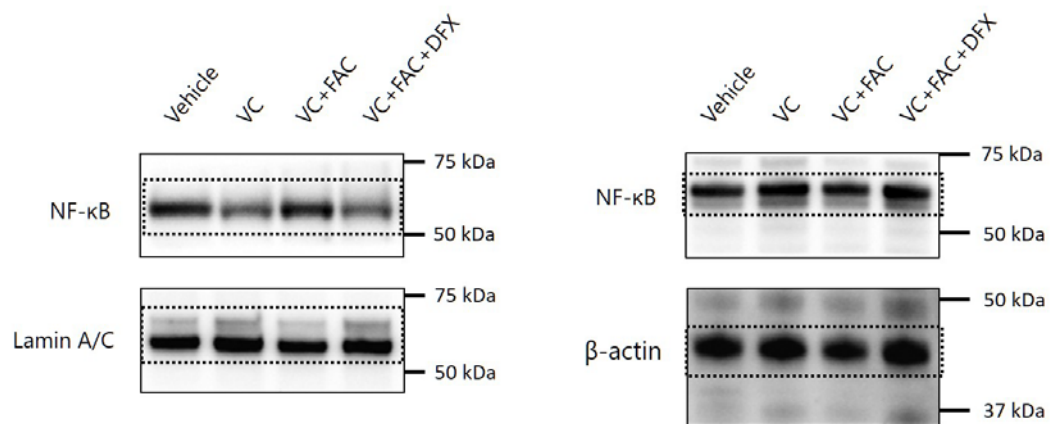

**Supplementary Figure 7. Full-length pictures of the blots presented in the main figure 5D.**

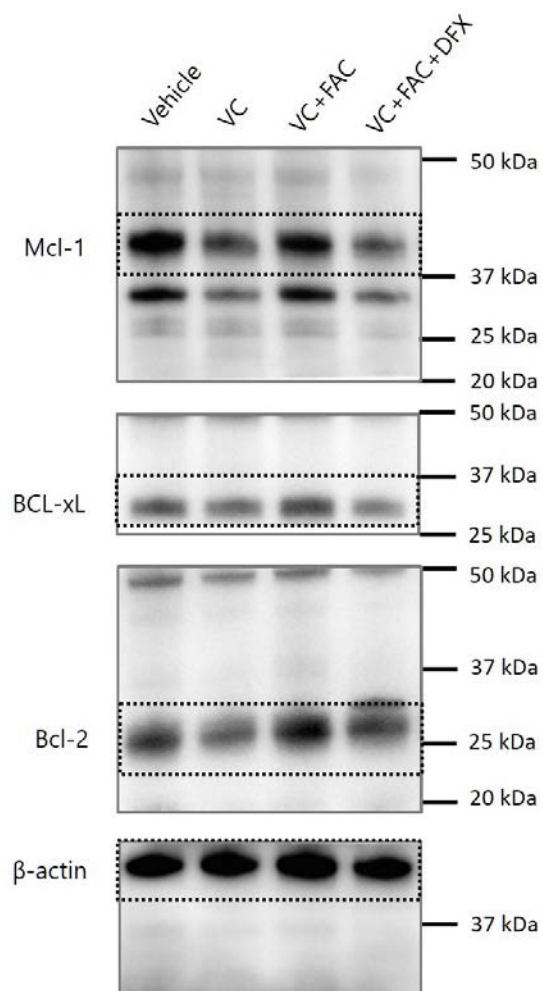

Supplement: 41598_2018_35730_MOESM1_ESM.pdf [file 41598_2018_35730_MOESM1_ESM.pdf]
